# Supplementary material for: Eco-friendly colorimetric detection of lead and mercury using l -cysteine-functionalized gold nanoparticles: a step towards greening the exposome
Source: Royal Society of Chemistry journal article supplement (doi:10.1039/d5ra01445j), 2025-01-01
Supplement: d5ra01445j1.pdf [file d5ra01445j1.pdf]

## Supplementary materials

### Eco-Friendly Colorimetric Detection of Lead and Mercury Using L-Cysteine-Functionalized Gold Nanoparticles: A Step Towards Greening the Exposome

Sharmila Sajankila Nadumane<sup>a</sup>, Rajib Biswas<sup>b\*</sup>, Nirmal  
Mazumder<sup>a \*</sup>

a.Department of Biophysics, Manipal School of Life Sciences, Manipal  
Academy of Higher Education, Manipal, Karnataka, India-576104

b.Department of Physics, Tezpur University, Tezpur, Assam, India-  
784028

c.\*Corresponding authors: [rajib@tezu.ernet.in](mailto:rajib@tezu.ernet.in) ;  
[nirmal.mazumder@manipal.edu](mailto:nirmal.mazumder@manipal.edu)

**Supplementary table 1: Surface zeta potential values**

| <b>Zeta potential (mV)</b> |               |             |             |               |             |             |
|----------------------------|---------------|-------------|-------------|---------------|-------------|-------------|
| <b>Day</b>                 | <b>25 nm</b>  |             |             | <b>31 nm</b>  |             |             |
|                            | <b>6.2 pH</b> | <b>7 pH</b> | <b>9 pH</b> | <b>6.2 pH</b> | <b>7 pH</b> | <b>9 pH</b> |
| 1                          | -25.7         | -28.0       | -15.4       | -14.0         | -16.6       | 0.167       |
| 2                          | -20.9         | -26.8       | -14.6       | 0.248         | -0.804      | -13.4       |
| 3                          | -25.3         | -26.2       | -10.1       | -26.1         | -13.7       | -26.0       |
| 4                          | -19.3         | -26.8       | -3.90       | -24.6         | -14.8       | -24.7       |
| 5                          | -22.8         | -20.6       | -5.39       | 0.199         | -14.8       | -23.7       |

Supplementary table 1: Surface zeta potential value of AuNPs of average size 25 nm and 31 nm of pH 6.2, 7 and 9) for 5 days.

**Supplementary Fig 1: Stability of AuNP (31 nm)-L Cys**

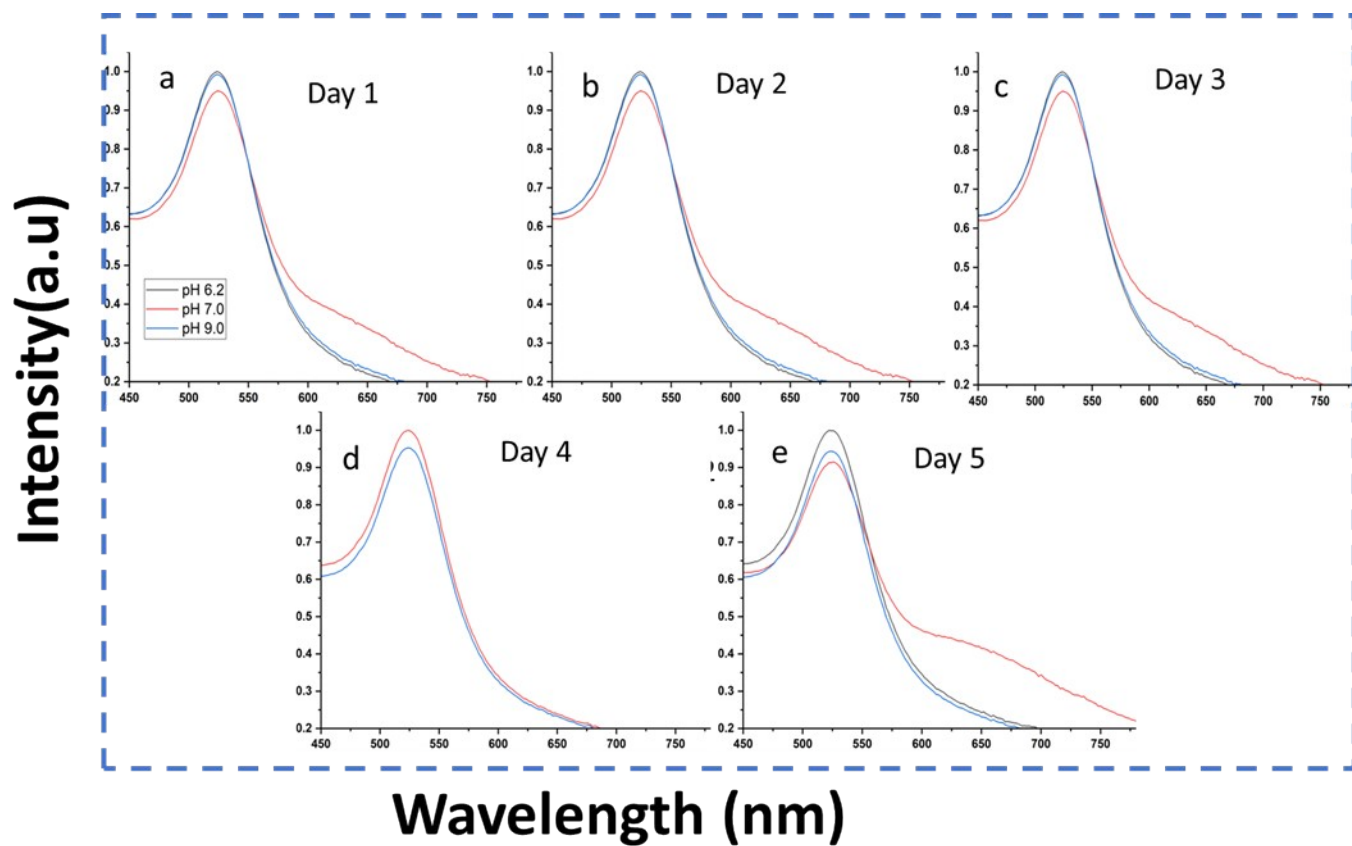

Supplementary Fig 1: Wavelength vs. intensity graph of AuNPs of average size 31 nm functionalized with L-cysteine with three different pH's 6.2, 7.0 and 9.0. for 5 days.

**Supplementary Fig 2: Stability of AuNP (25 nm)-L Cys**

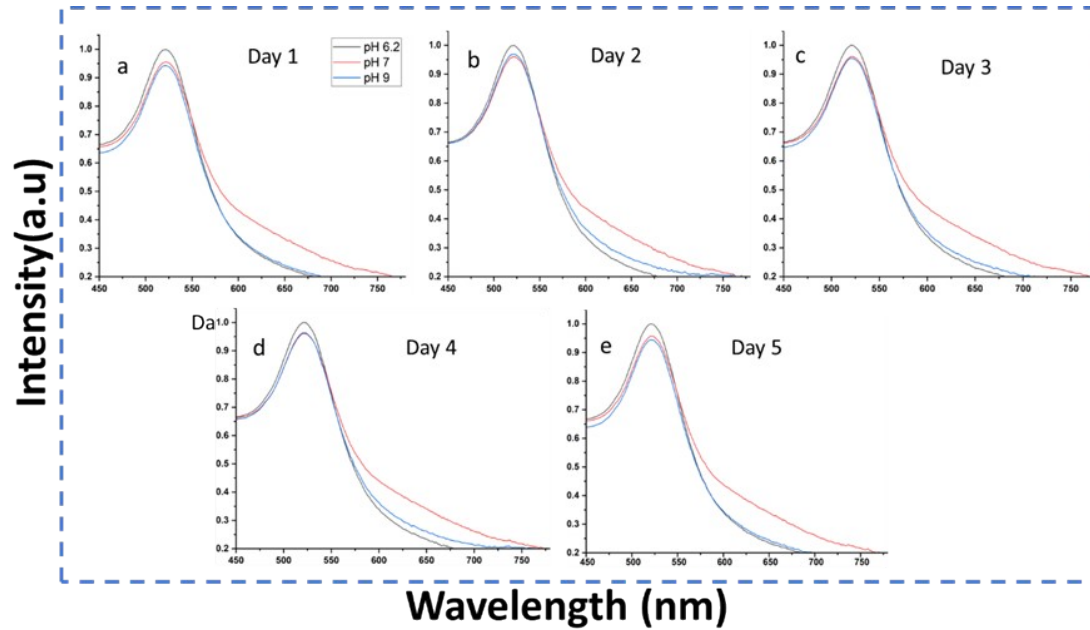

Supplementary Fig 2: Wavelength vs. intensity graph of AuNPs of average size 25 nm functionalized with L-cysteine with three different pH's 6.2, 7.0 and 9.0. for 5 days.

**Supplementary Fig 3: Absorbance graph of AuNP (31nm)-L Cys and heavy metals**

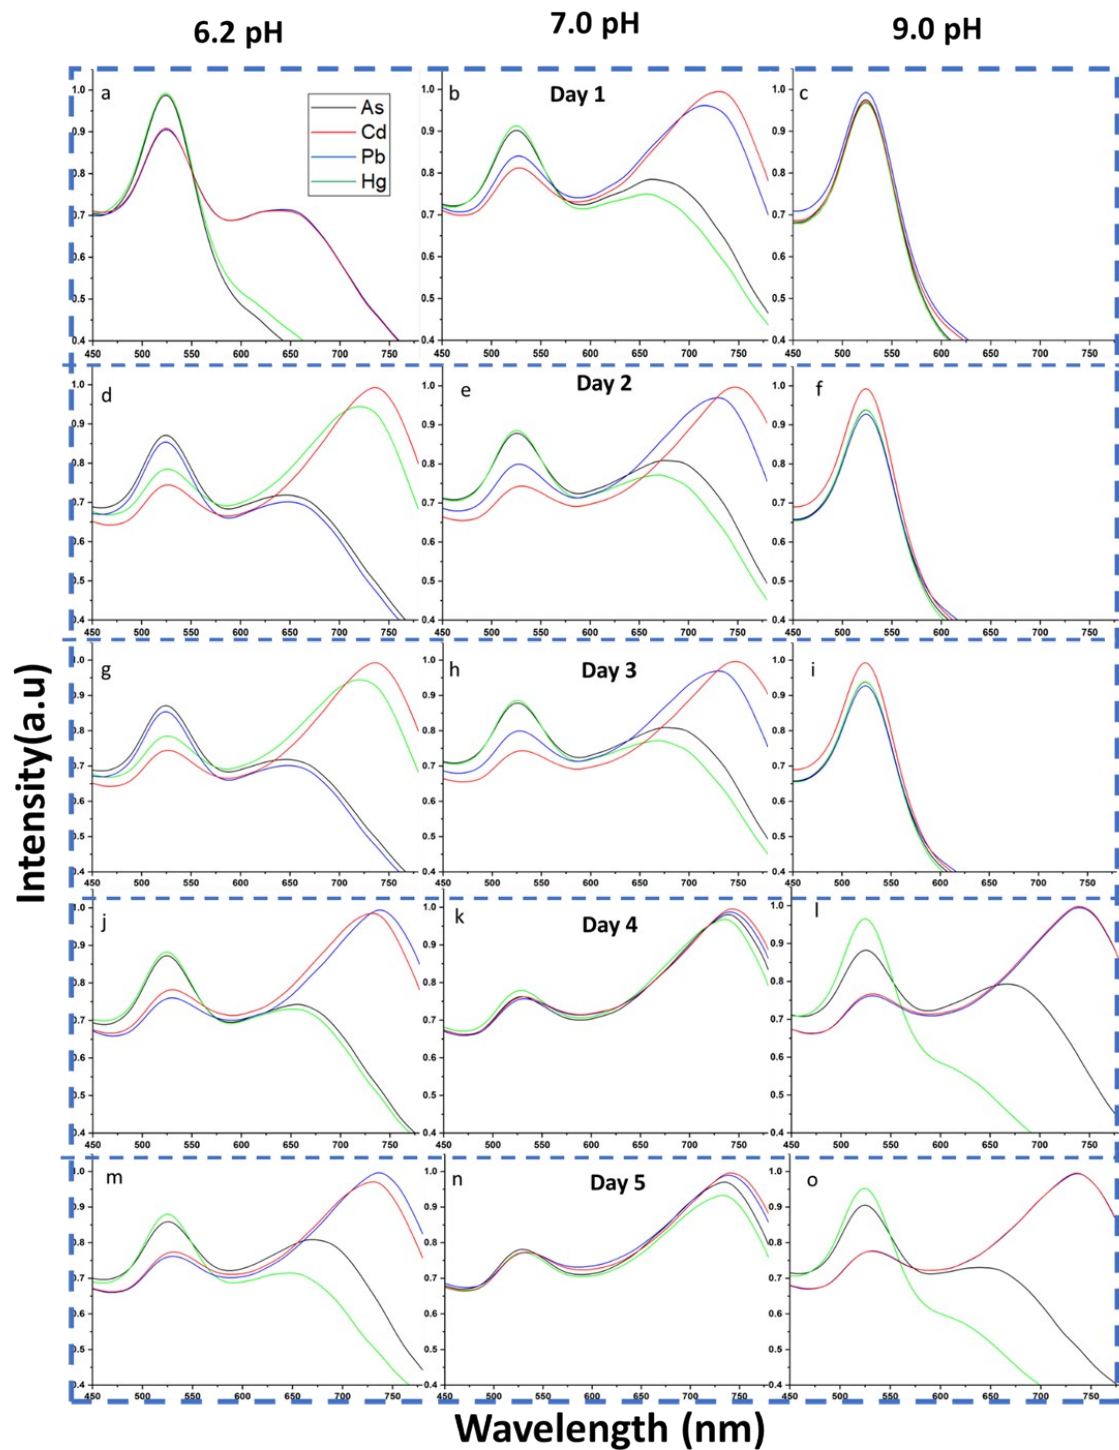

Supplementary Fig 3: Wavelength vs. intensity graph of gold nanoparticles of 31nm (AuNPs) functionalized with L-cysteine with three different pH's 6.2, 7.0 and 9.0 for 5 days. (First row, middle row and third row respectively) with heavy metals.

# Supplementary Fig 4: Absorbance graph of AuNP (25 nm)-L Cys and heavy metals

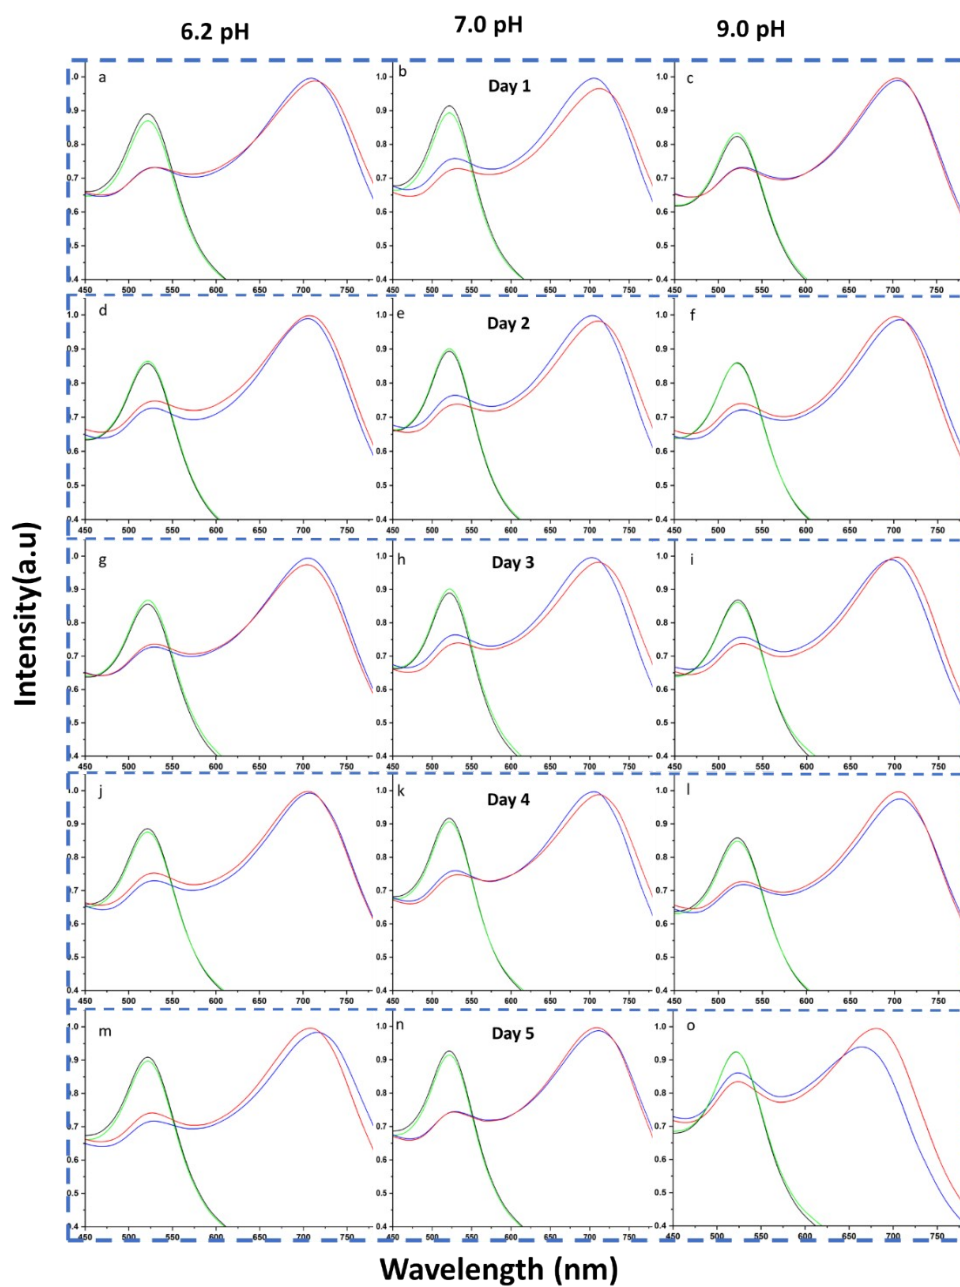

Supplementary Fig 4: Wavelength vs. intensity graph of gold nanoparticles (AuNPs) with 25nm functionalized with L-cysteine with three different pH's 6.2, 7.0 and 9.0 for 5 days. (First row, middle row and third row respectively) with heavy metal.
